# Supplementary material for: A series of inorganic–organic hybrid cadmium borates with novel Cd-centred [Cd@B14O20(OH)6]2− clusters
Source: Royal Society of Chemistry journal article supplement (doi:10.1039/c6dt02875f), 2016-01-01
Supplement: c6dt02875f1.pdf [file c6dt02875f1.pdf]

## *Supporting Information*

### **A Series of inorganic–organic hybrid cadmium borates with novel Cd-centred [Cd@B<sub>14</sub>O<sub>20</sub>(OH)<sub>6</sub>]<sup>2-</sup> clusters**

Qi Wei,<sup>a</sup> Ya-Jun Zhang,<sup>c</sup> Ying Song,<sup>c</sup> Guo-Yu Yang,<sup>\*a</sup> and Xiaodong Zou<sup>\*b</sup>

<sup>a</sup> MOE Key Laboratory of Cluster Science, School of Chemistry, Beijing Institute of Technology, Beijing 100081, China. Email: ygy@bit.edu.cn

<sup>b</sup> Inorganic and Structural Chemistry, Stockholm University, SE-106 91 Stockholm, Sweden. Fax: (+46)8-162389; Email: xzou@mmk.su.se or zou@struc.su.se

<sup>c</sup> State Key Laboratory of Structural Chemistry, Fujian Institute of Research on the Structure of Matter, Chinese Academy of Sciences, Fuzhou, Fujian 350002, China.

**Table S1.** Selected bond length ranges (Å) of compounds **1-4**.

**Table S2.** Details of hydrogen bonds data of compounds **1-4**.

**Figure S1.** The fundamental building block of [N<sub>2</sub>Cd@B<sub>14</sub>O<sub>20</sub>(OH)<sub>6</sub>] of compounds **1-4**.

**Figure S2.** (a) View of the layer of **1** with two types narrow 8-m supramolecular rings in the *ac* plane. (b) View of the layer of **3** with quasi-hexagonal and narrow 8-m rings in the *ac* plane. (c) View of the layer of **4** with two types 4-m rings in the *ab* plane.

**Figure S3.** Simulated and experimental powder XRD patterns of compounds **1-4**.

**Figure S4.** IR spectra of compounds **1-4**.

**Figure S5.** TG curves of compounds **1-4**.

**Table S1.** Selected bond length ranges (Å) of compounds **1-4**.

| Compound             | 1                   | 2                 | 3                   | 4                     |
|----------------------|---------------------|-------------------|---------------------|-----------------------|
| Cd-N                 | 2.296(2)-2.296(2)   | 2.274(7)-2.274(7) | 2.292(2)-2.292(2)   | 2.232(2)-2.232(2)     |
| Cd-O                 | 2.3494(18)-2.366(2) | 2.346(4)-2.373(4) | 2.3733(18)-2.382(2) | 2.3532(18)-2.3789(17) |
| B(1) <sub>Δ</sub> -O | 1.353(3)-1.385(3)   | 1.349(7)-1.383(7) | 1.344(4)-1.395(4)   | 1.354(4)-1.387(4)     |
| B(2) <sub>T</sub> -O | 1.424(3)-1.527(3)   | 1.419(7)-1.524(7) | 1.442(3)-1.533(3)   | 1.435(3)-1.523(3)     |
| B(3) <sub>Δ</sub> -O | 1.352(3)-1.378(3)   | 1.348(7)-1.396(7) | 1.352(4)-1.371(3)   | 1.350(3)-1.374(4)     |
| B(4) <sub>Δ</sub> -O | 1.353(3)-1.385(3)   | 1.358(7)-1.362(7) | 1.354(4)-1.373(3)   | 1.353(3)-1.373(4)     |
| B(5) <sub>Δ</sub> -O | 1.352(4)-1.373(4)   | 1.346(7)-1.389(7) | 1.340(3)-1.395(3)   | 1.349(4)-1.389(3)     |
| B(6) <sub>Δ</sub> -O | 1.355(3)-1.379(3)   | 1.351(7)-1.374(7) | 1.356(4)-1.378(4)   | 1.357(3)-1.374(3)     |
| B(7) <sub>T</sub> -O | 1.419(3)-1.526(3)   | 1.425(6)-1.520(7) | 1.439(3)-1.524(3)   | 1.426(3)-1.527(3)     |

**Table S2.** Details of hydrogen bonds data of compounds **1-4**.

| Interaction           | D-H(Å) | H...A<br>(Å) | D...A<br>(Å) | <DHA<br>(°) |
|-----------------------|--------|--------------|--------------|-------------|
| <b>Compound 1</b>     |        |              |              |             |
| N1-H1D...O11(#1)      | 0.89   | 2.01         | 2.878(4)     | 165.5       |
| N1-H1D...O12(#1)      | 0.89   | 2.55         | 3.221(3)     | 132.2       |
| N1-H1E...O4(#2)       | 0.89   | 2.04         | 2.910(3)     | 164.4       |
| N1-H1F...O3           | 0.89   | 1.99         | 2.767(3)     | 145.5       |
| O4-H4A...O7(#3)       | 0.82   | 1.93         | 2.748(3)     | 174.8       |
| O3-H3A...O10(#1)      | 0.82   | 1.87         | 2.679(3)     | 171.4       |
| O2-H2A...O13(#4)      | 0.82   | 1.91         | 2.714(3)     | 166.5       |
| <b>Compound 2</b>     |        |              |              |             |
| O1-H1A...O9(#1)       | 0.82   | 1.9          | 2.705(5)     | 165.8       |
| O2-H2A...O12(#2)      | 0.82   | 1.88         | 2.687(5)     | 169.8       |
| O3-H3A...O11(#3)      | 0.82   | 1.96         | 2.777(5)     | 173.4       |
| N2-H2C...O8(#2)       | 0.89   | 1.98         | 2.866(7)     | 170.6       |
| N2-H2C...O13(#2)      | 0.89   | 2.57         | 3.190(7)     | 126.9       |
| N2-H2D...O3(#4)       | 0.89   | 2.07         | 2.912(6)     | 157.9       |
| N2-H2E...O2           | 0.89   | 1.94         | 2.775(6)     | 155.3       |
| <b>Compound 3</b>     |        |              |              |             |
| O1-H1B...O6(#1)       | 0.85   | 2.53         | 3.384(3)     | 179.9       |
| O2-H2D...O11(#2)      | 0.82   | 2.1          | 2.806(3)     | 144.6       |
| O11-<br>H11A...O4(#3) | 0.82   | 1.95         | 2.751(3)     | 164.3       |
| N2-H2B...O9(#4)       | 0.86   | 1.78         | 2.629(3)     | 169.6       |
| N2-H2B...O7(#4)       | 0.86   | 2.65         | 3.174(3)     | 120.5       |
| <b>Compound 4</b>     |        |              |              |             |
| O2-H2B...O7(#1)       | 0.82   | 2            | 2.739(3)     | 149.4       |
| O3-H3F...O1(#2)       | 0.82   | 1.8          | 2.594(3)     | 162.9       |
| O3-H3F...O10(#2)      | 0.82   | 2.68         | 3.102(3)     | 113.9       |
| O5-H5C...O12(#3)      | 0.82   | 2            | 2.808(3)     | 168.8       |
| N3-H3C...O10(#4)      | 0.89   | 2.43         | 3.053(3)     | 127.5       |
| N3-H3D...O3(#3)       | 0.89   | 2.03         | 2.884(3)     | 159.1       |
| N3-H3E...O7(#5)       | 0.89   | 2.44         | 3.095(3)     | 131.0       |

Symmetry codes: For **1**: (#1)  $-x+1, y+1/2, -z+1/2$ ; (#2)  $-x+2, y+1/2, -z+1/2$ ; (#3)  $-x+1, y-1/2, -z+1/2$ ; (#4)  $x-1, y, z$ . For **2**: (#1)  $x-1, y, z$ ; (#2)  $-x+1, y+1/2, -z+1/2$ ; (#3)  $-x+1, y-1/2, -z+1/2$ ; (#4)  $-x+2, y+1/2, -z+1/2$ . For **3**: (#1)  $-x-1, y-1/2, -z+1/2$ ; (#2)  $-x-2, -y, -z$ ; (#3)  $x-1, y, z$ ; (#4)  $-x-1, y-1/2, -z+1/2$ . For **4**: (#1)  $-x+1, -y+2, -z$ ; (#2)  $x-1, y, z$ ; (#3)  $-x+1, -y+1, -z$ ; (#4)  $-x+2, -y+1, -z$ ; (#5)  $x+1, y-1, z$ .

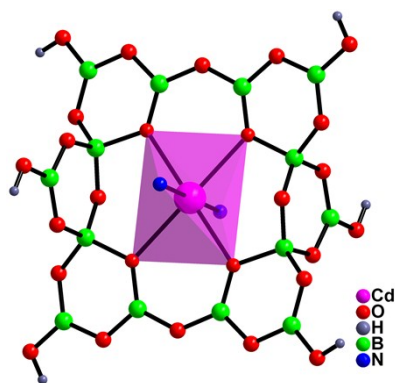

**Figure S1.** The fundamental building block of  $[\text{N}_2\text{Cd}@\text{B}_{14}\text{O}_{20}(\text{OH})_6]$  of compounds 1-4.

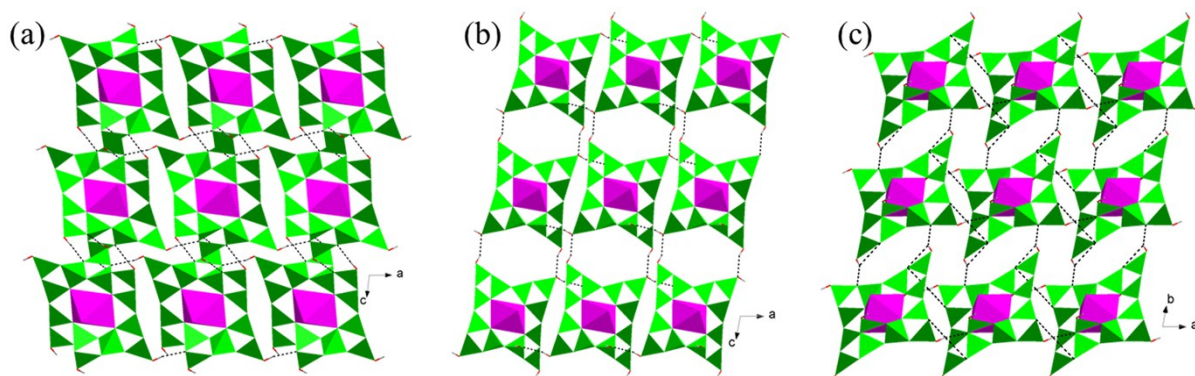

**Figure S2.** View of the layer of (a) **1** with two types narrow 8-MRs in the  $ac$  plane, (b) **3** with quasi-hexagonal and narrow 8-MRs in the  $ac$  plane, and (c) **4** with two types 6-MR in the  $ab$  plane.

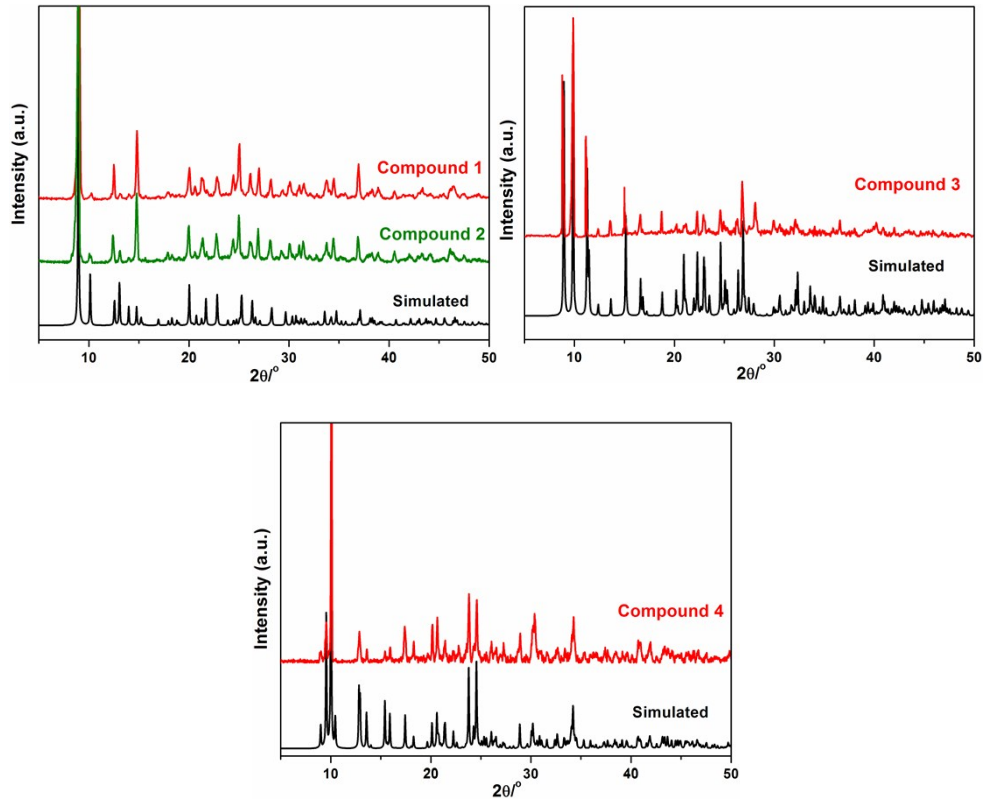

**Figure S3.** Simulated and experimental powder XRD patterns of compounds 1-4.

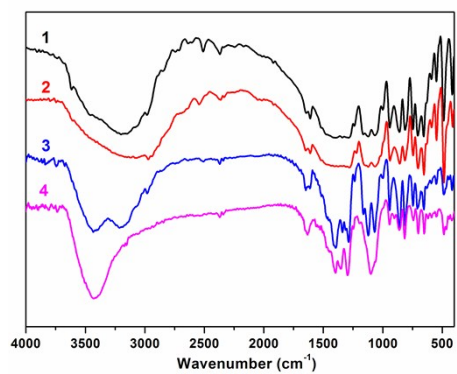

**Figure S4.** IR spectra of compounds 1-4.

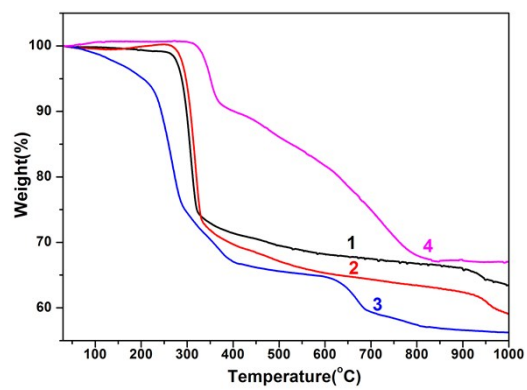

**Figure S5.** TG curves of compounds 1-4.
